# Supplementary material for: Native and oxidised lipoproteins negatively regulate the serum amyloid A‐induced NLRP3 inflammasome activation in human macrophages
Source: PubMed Central journal article supplement (PMC8329955; doi:10.1002/cti2.1323), 2021-08-03
Supplement: CTI2-10-e1323-s001.pdf [file CTI2-10-e1323-s001.pdf]

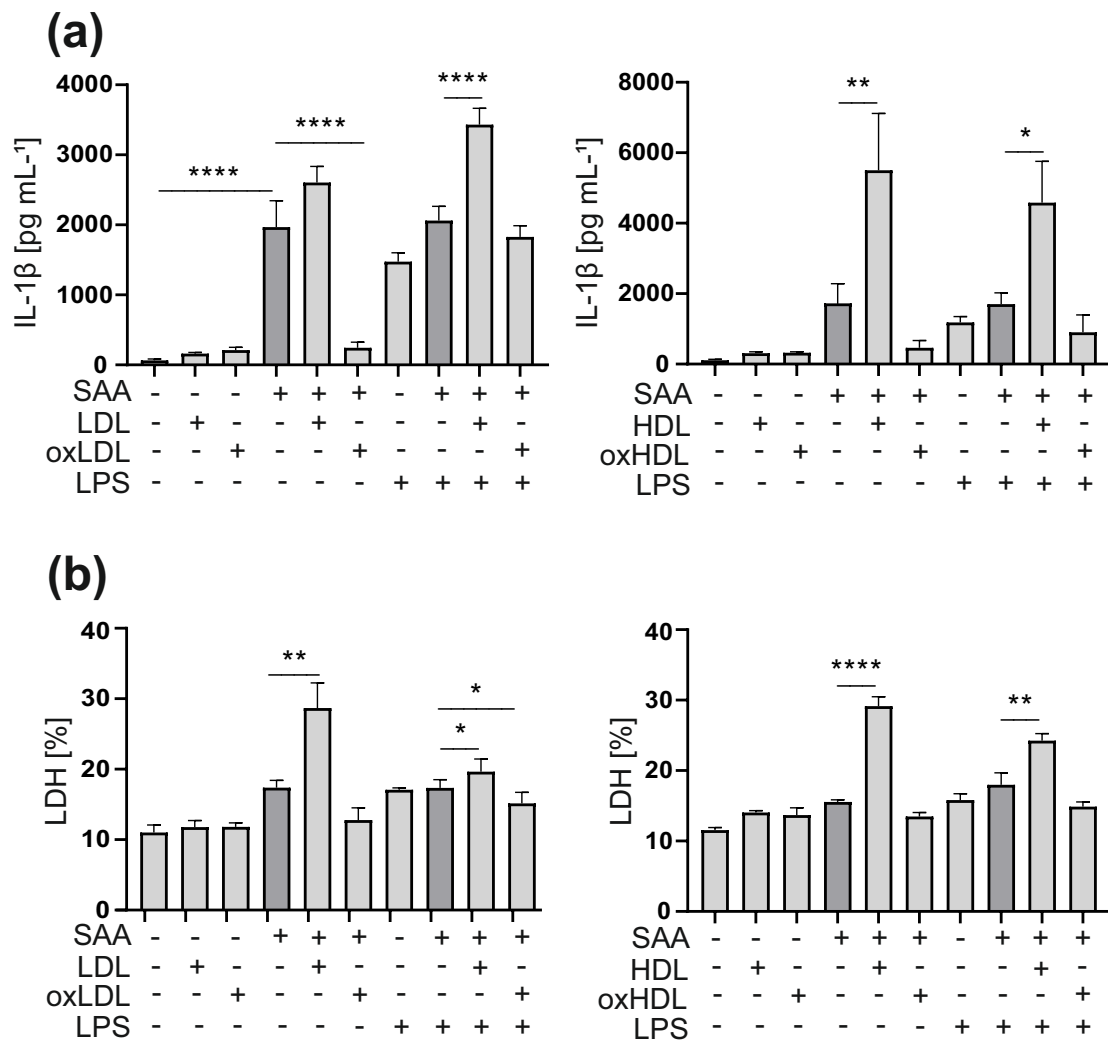

### Supplementary Figure 1

THP-1 macrophages were primed with LPS (Sigma L3012, 1  $\mu\text{g mL}^{-1}$ , 3 h), after which they were subjected to native or oxidised LDL or native or oxidised HDL<sub>3</sub> (200  $\mu\text{g mL}^{-1}$ ) for 1 h, and then to SAA (3  $\mu\text{g mL}^{-1}$ ) for 5 h. **(a)** Secretion of IL-1 $\beta$  was analysed from cell culture media by ELISA. Native and oxidised LDL, left panel; native and oxidised HDL<sub>3</sub>, right panel. **(b)** LDH was analysed from cell culture media. Native and oxidised LDL, left panel; native and oxidised HDL<sub>3</sub>, right panel. The mean values shown are from 4 experiments. \* $P < 0.05$ , \*\* $P < 0.01$ , \*\*\*\* $P < 0.0001$ .

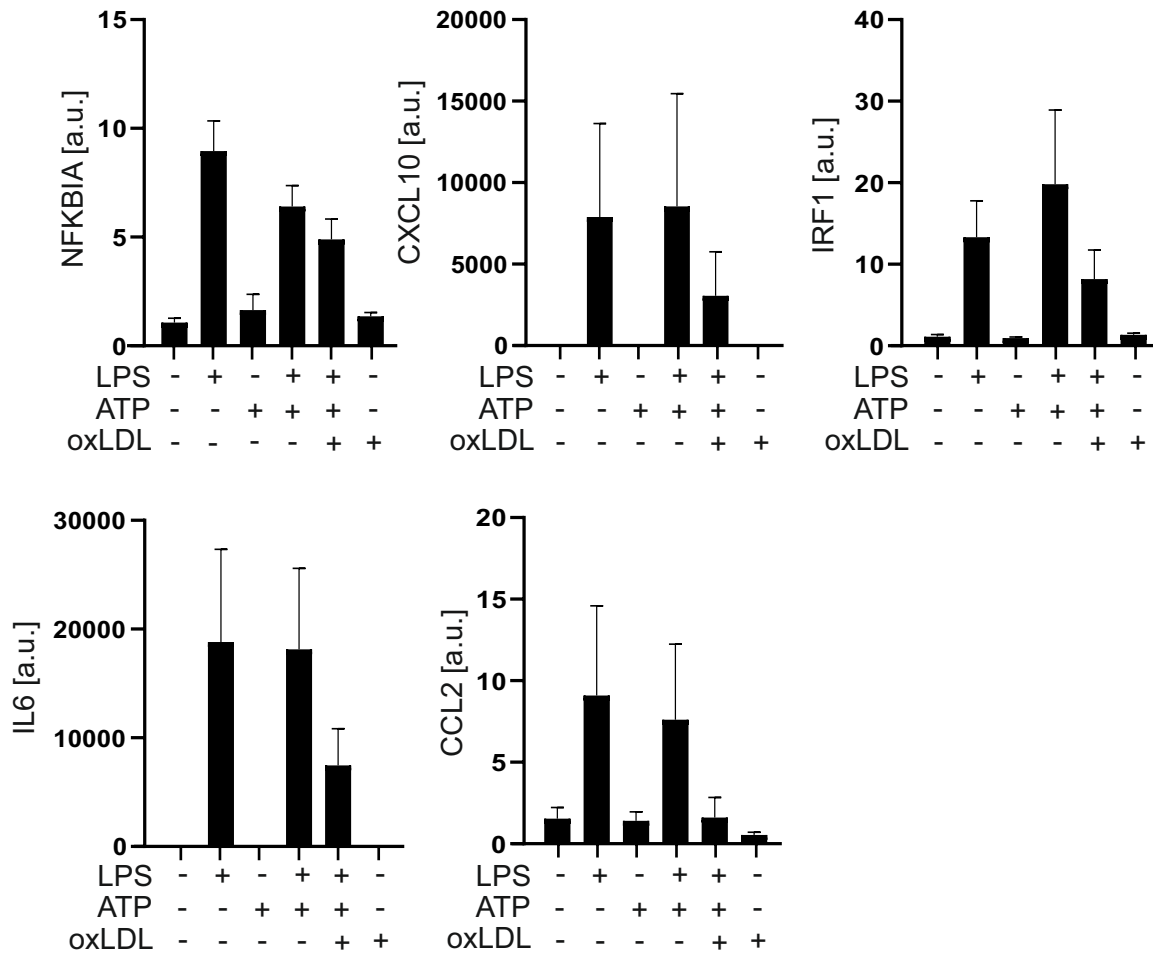

### Supplementa ry Figure 2

Human primary macrophages were primed with LPS for 3 h, then subjected to oxidised LDL  $400 \mu\text{g mL}^{-1}$  for 3 h and activated with ATP. The expression of *NFKBIA*, *CXCL10*, *IRF1*, *IL6* and *CCL2* mRNA was analysed by quantitative real-time RT-PCR and is expressed as arbitrary units (a.u.) . The mean values shown are from 4 experiments.

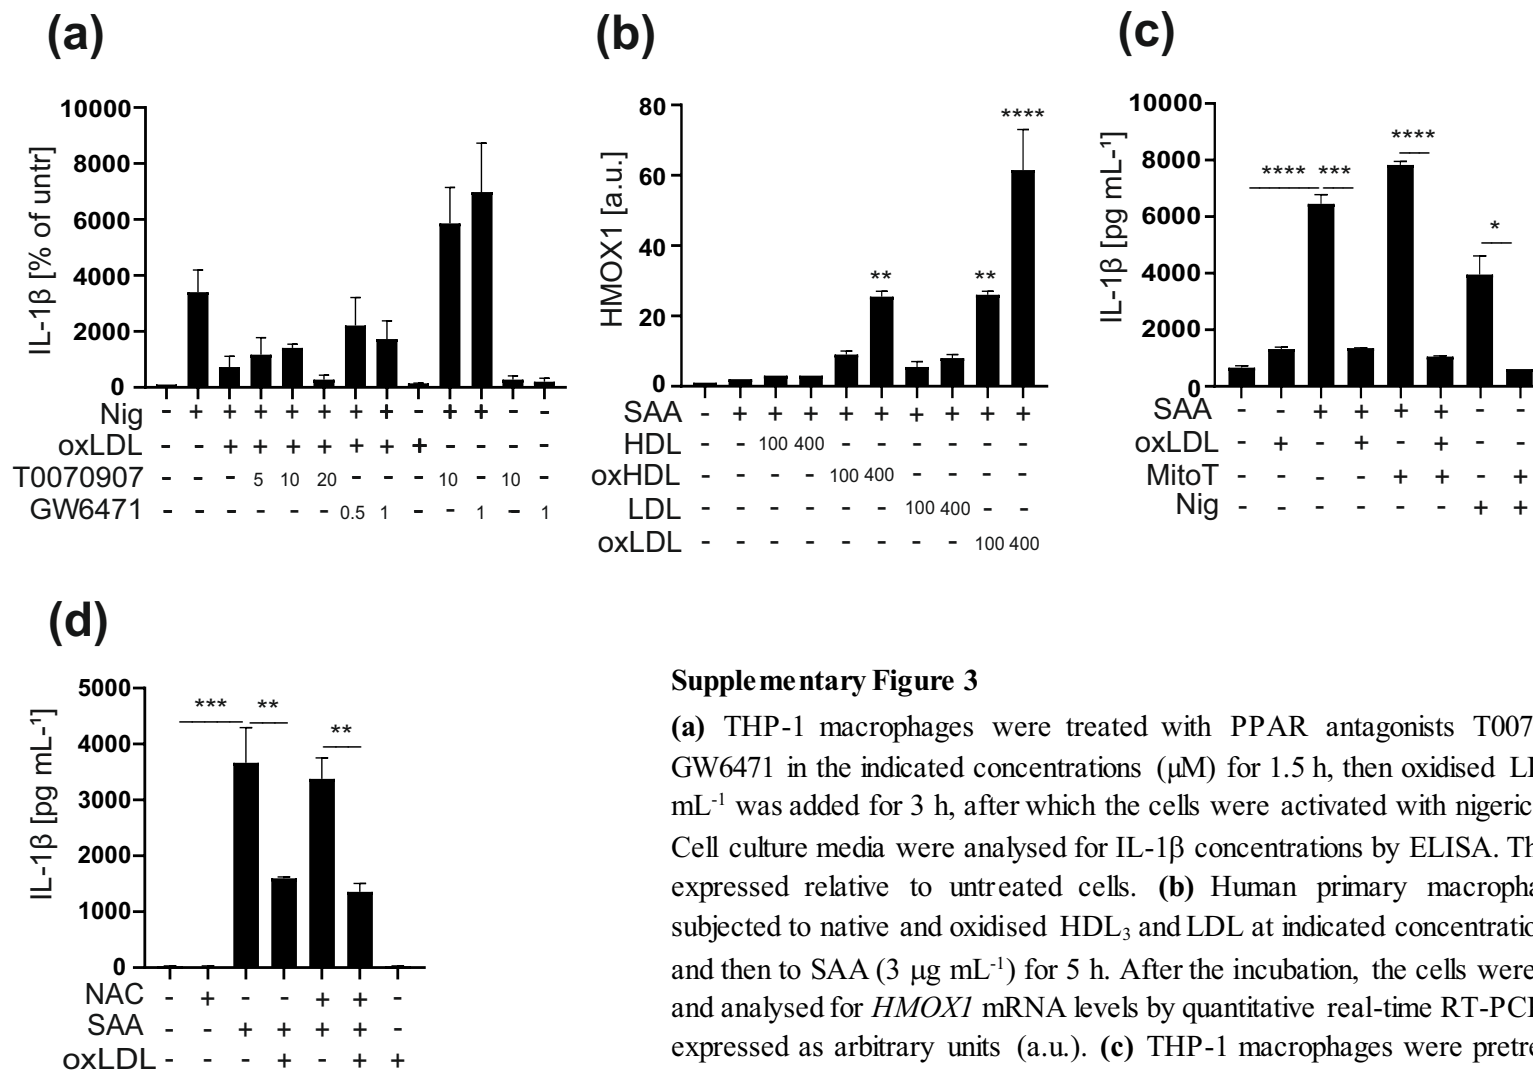

### Supplementary Figure 3

**(a)** THP-1 macrophages were treated with PPAR antagonists T0070907 and GW6471 in the indicated concentrations ( $\mu\text{M}$ ) for 1.5 h, then oxidised LDL  $400 \mu\text{g mL}^{-1}$  was added for 3 h, after which the cells were activated with nigericin for 1 h. Cell culture media were analysed for IL-1 $\beta$  concentrations by ELISA. The data are expressed relative to untreated cells. **(b)** Human primary macrophages were subjected to native and oxidised HDL<sub>3</sub> and LDL at indicated concentrations for 1 h and then to SAA ( $3 \mu\text{g mL}^{-1}$ ) for 5 h. After the incubation, the cells were harvested and analysed for *HMOX1* mRNA levels by quantitative real-time RT-PCR. Data are expressed as arbitrary units (a.u.). **(c)** THP-1 macrophages were pretreated with MitoTEMPO  $300 \mu\text{M}$  for 1 h, after which oxidised LDL  $400 \mu\text{g mL}^{-1}$  was added for 1 h, and then the cells were activated with SAA  $3 \mu\text{g mL}^{-1}$  for 5 h. Cell culture media were analysed for IL-1 $\beta$  concentrations by ELISA. **(d)** THP-1 macrophages were pretreated with N-acetyl cysteine (NAC)  $0.5 \mu\text{M}$  for 1 h, after which oxidised LDL  $200 \mu\text{g mL}^{-1}$  was added for 1 h, and finally the cells were activated with SAA  $3 \text{ mg mL}^{-1}$  for 18 h. Cell culture media were analysed for IL-1 $\beta$  concentrations by ELISA. The mean values shown are from 2 experiments.  $**P < 0.01$ ,  $***P < 0.001$ ,  $****P < 0.0001$ .

## Supplementary table 1. Primers

| Gene          | F (5'-3')                 | R (5'-3')                 | probe                                 |
|---------------|---------------------------|---------------------------|---------------------------------------|
| <i>IL1B</i>   | TTACAGTGGCAATGAGGATGAC    | GTCGGAGATTCGTAGCTGGAT     | FAM-AACAGATGAAGTGCTCCTTCCAGGACC- BHQ1 |
| <i>TNF</i>    | GCTGCACTTTGGAGTGATCG      | GTTTGCTACAACATGGGCTACAG   | FAM- CCCAGGCAGTCAGATCATCTTCTCGA-BHQ1  |
| <i>GAPDH</i>  | CCACATCGCTCAGACACCAT      | GGCAACAATATCCACTTTACCAGAG | FAM-CCAATACGACCAAATCCGTTGACTCC-BHQ1   |
| <i>NFKBIA</i> | CGGACTGCCCTTCACCTCGC      | GTATCCGGGTGCTTGGGCGG      |                                       |
| <i>CXCL10</i> | GCAAGCCAATTTTGTCCACGTGTTG | CAGCCTCTGTGTGGTCCATCCTT   |                                       |
| <i>IRF1</i>   | CATGAGACCCTGGCTAGAGATG    | TCCGGAACAAACAGGCATCC      |                                       |
| <i>IL6</i>    | AGGAGACTTGCCTGGTGAAG      | GAGGTGCCCATGCTACATTT      |                                       |
| <i>CCL2</i>   | ATTCCCAAGGGCTCGCTCA       | GGTTTGCTTGTCCAGGTGGTCC    |                                       |
| <i>GAPDH</i>  | TCACCATCTTCCAGGAGCGA      | TGGACTCCACGACGTACTCA      |                                       |
